# Supplementary material
Source: Springer Nature journal article supplement (https://www.springermedizin.de/resource/supplementary/12874_2009_415_MOESM5_ESM.pdf/9432040)

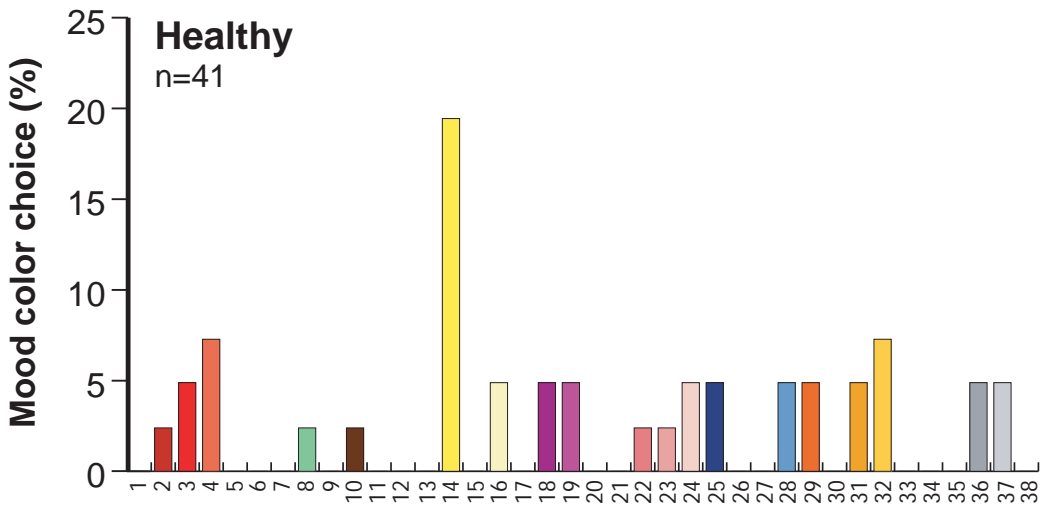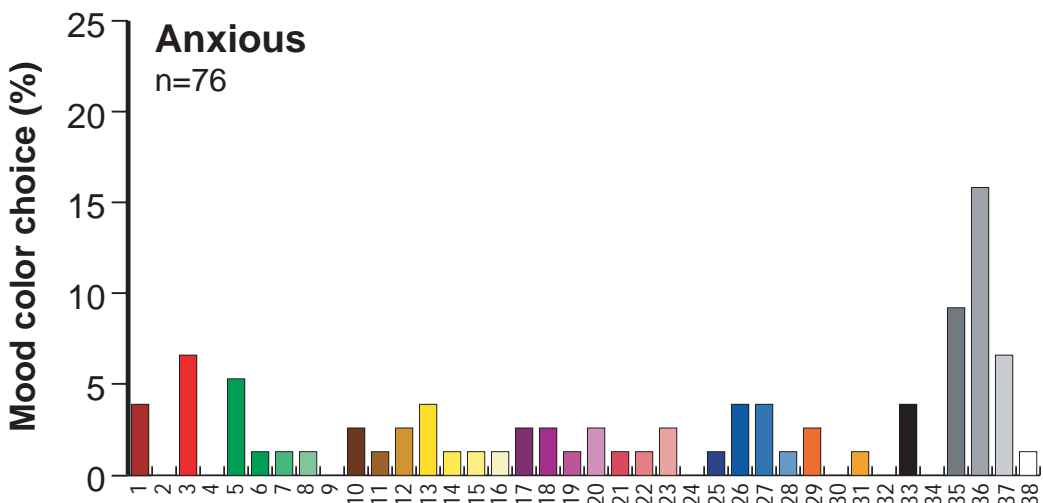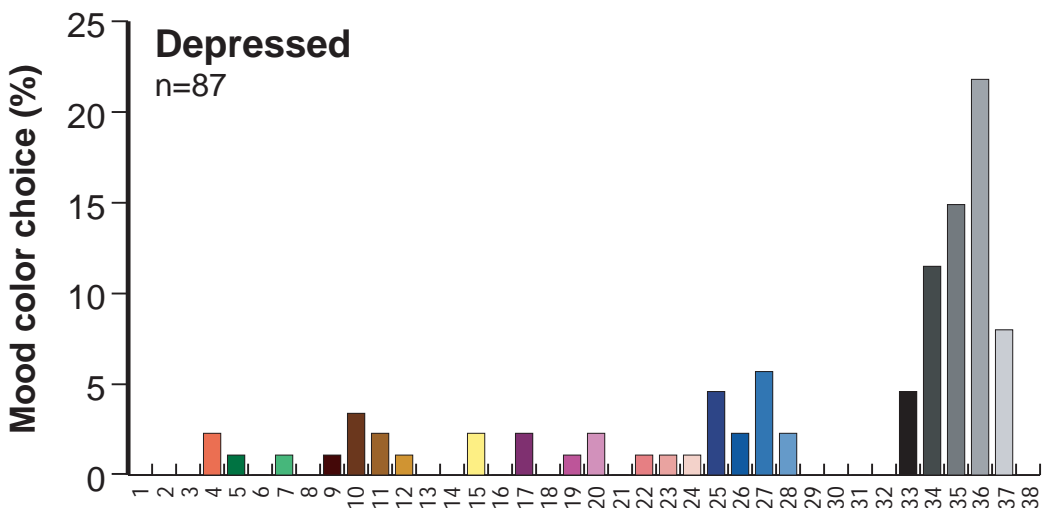

Individual colors of the 'Color Wheel'

Supplement: MOESM5 [file 9432040]
